# Supplementary material for: Better TIR, HbA1c, and less hypoglycemia in closed-loop insulin system in patients with type 1 diabetes: a meta-analysis
Source: PubMed Central journal article supplement — BMJ Open Diabetes Res Care. 2022 Apr 21;10(2):e002633. doi: 10.1136/bmjdrc-2021-002633 (PMC9024214; doi:10.1136/bmjdrc-2021-002633), 2022-04-21

**Appendices****Appendix 1****Protocol**

The effectiveness and safety of long-term use of closed-loop insulin system in patients with type 1 diabetes: a systematic review and meta-analysis

**Population**

Patients with type 1 diabetes mellitus (T1DM) under free living conditions, excluded who were pregnant women or had severe diseases or were prescribed additional medications were excluded.

**Intervention**

Any closed-loop delivery system, which is a smart device that automatically delivers insulin based on glucose readings

**Comparators**

Any type of conventional insulin pump, including multiple daily injections (MDI), insulin pump therapy, sensor-augmented insulin pump therapy.

**Outcomes****Primary outcome:**

The proportion (%) of time in target range (TIR) (3.9-10.0mmol/L)

**Secondary outcomes:**

The proportion (%) of time above target range (TAR) (>10 mmol/L)

The proportion (%) of time below target range (TBR) (<3.9 mmol/L)

Glycated hemoglobin changes (HbA1c %)

Low blood glucose index (LBGI)

High blood glucose index (HBGI)

Coefficient of variation of glucose (CV)

Mean glucose (MG)

Total daily insulin dose

### **Study design**

All randomized clinical trials (RCTs), with parallel group or cross-over design, with a minimum follow-up cycle of at least 2 months after initial treatment.

### **Information sources**

#### **Search strategy**

Determine keywords through the PICOS principle, search for a single keyword separately, check whether there are words with the same meaning but different expressions from the summary or other meta-analysis containing the keyword, and add these words to the search query to expand Search scope, and finally, combine the keyword search formulas to limit the research type. We will search the following databases and resources (via relevant interfaces):

- MEDLINE (PubMed)
- EMBASE (OvidSP)

- Cochrane Database of Systematic Reviews (CDSR) (Wiley Online Library)
- Cochrane Central Register of Controlled Trials (CENTRAL) (Wiley Online Library)

### **Study selection & data collection**

Two independent reviewers screened the titles and abstracts of the obtained articles, and reviewed the full text. In addition, two independent reviewers extracted the following data in a standardized form: demographic parameters, methodological characteristics, primary and secondary outcome indicators, and serious adverse events. Any discrepancies can be resolved through discussion or negotiation with senior examiners.

### **Study quality assessment**

The methodological quality of each clinical trial was evaluated by the Cochrane risk of bias tool[9]. Two researchers (J, C) have independently evaluated the studies based on selection bias (random sequence generation), detection bias (blinding of outcome assessment), performance bias (blinding of participants and personnel), attrition bias (incomplete outcome data) and reporting bias (selective reporting), as well as overall assessment of the risk of bias (other bias). Any disagreements were resolved by consensus or following discussion with another senior reviewer.

### **Data synthesis**

#### **Methods of analysis**

Meta-analysis was conducted only if the data of at least two studies were available. We will calculate mean differences with 95% confidence intervals and and p value for the overall effect, using an inverse-variance weighted random effects model, performed with RevMan 5.3.5 software.

**Subgroup analyses**

Depending on accrued evidence, for the primary outcome we plan to conduct subgroup analyses based on mode of intervention (overnight or 24h use of closed-loop delivery system), mobile or embedded setting, with or without remote monitoring.

**Sensitivity analyses**

We will do sensitivity analysis for the primary outcome excluding trials at unclear or high risk of bias.

**Investigation of heterogeneity**

We will assess presence of statistical heterogeneity by the magnitude of heterogeneity by means of the I<sup>2</sup> statistic, with P values < 0.10 and I<sup>2</sup> > 50% respectively representing high heterogeneity. All analyses will be undertaken in Revman.

## Appendix 2: PRISMA statement

|                           | # | Checklist item                                                                                                                                                                                                                                                                                              | Reported on page # |
|---------------------------|---|-------------------------------------------------------------------------------------------------------------------------------------------------------------------------------------------------------------------------------------------------------------------------------------------------------------|--------------------|
| <b>TITLE</b>              |   |                                                                                                                                                                                                                                                                                                             |                    |
| Title                     | 1 | Identify the report as a systematic review, meta-analysis, or both.                                                                                                                                                                                                                                         | 1                  |
| <b>ABSTRACT</b>           |   |                                                                                                                                                                                                                                                                                                             |                    |
| Structured summary        | 2 | Provide a structured summary including, as applicable: background; objectives; data sources; study eligibility criteria, participants, and interventions; study appraisal and synthesis methods; results; limitations; conclusions and implications of key findings; systematic review registration number. | 2                  |
| <b>INTRODUCTION</b>       |   |                                                                                                                                                                                                                                                                                                             |                    |
| Rationale                 | 3 | Describe the rationale for the review in the context of what is already known.                                                                                                                                                                                                                              | 3,4                |
| Objectives                | 4 | Provide an explicit statement of questions being addressed with reference to participants, interventions, comparisons, outcomes, and study design (PICOS).                                                                                                                                                  | 4                  |
| <b>METHODS</b>            |   |                                                                                                                                                                                                                                                                                                             |                    |
| Protocol and registration | 5 | Indicate if a review protocol exists, if and where it can be accessed (e.g., Web address), and, if available, provide registration information including registration number.                                                                                                                               | no                 |

|                                    |    |                                                                                                                                                                                                                        |               |
|------------------------------------|----|------------------------------------------------------------------------------------------------------------------------------------------------------------------------------------------------------------------------|---------------|
| Eligibility criteria               | 6  | Specify study characteristics (e.g., PICOS, length of follow-up) and report characteristics (e.g., years considered, language, publication status) used as criteria for eligibility, giving rationale.                 | 5             |
| Information sources                | 7  | Describe all information sources (e.g., databases with dates of coverage, contact with study authors to identify additional studies) in the search and date last searched.                                             | 4,5           |
| Search                             | 8  | Present full electronic search strategy for at least one database, including any limits used, such that it could be repeated.                                                                                          | 4, appendix 3 |
| Study selection                    | 9  | State the process for selecting studies (i.e., screening, eligibility, included in systematic review, and, if applicable, included in the meta-analysis).                                                              | 5             |
| Data collection process            | 10 | Describe method of data extraction from reports (e.g., piloted forms, independently, in duplicate) and any processes for obtaining and confirming data from investigators.                                             | 5             |
| Data items                         | 11 | List and define all variables for which data were sought (e.g., PICOS, funding sources) and any assumptions and simplifications made.                                                                                  | 5             |
| Risk of bias in individual studies | 12 | Describe methods used for assessing risk of bias of individual studies (including specification of whether this was done at the study or outcome level), and how this information is to be used in any data synthesis. | 6             |
| Summary measures                   | 13 | State the principal summary measures (e.g., risk ratio, difference in means).                                                                                                                                          | 6             |

| Section/topic               | #  | Checklist item                                                                                                                                                                                           | Reported on page # |
|-----------------------------|----|----------------------------------------------------------------------------------------------------------------------------------------------------------------------------------------------------------|--------------------|
| Synthesis of results        | 14 | Describe the methods of handling data and combining results of studies, if done, including measures of consistency (e.g., I <sup>2</sup> ) for each meta-analysis.                                       | 6                  |
| Risk of bias across studies | 15 | Specify any assessment of risk of bias that may affect the cumulative evidence (e.g., publication bias, selective reporting within studies).                                                             | 6                  |
| Additional analyses         | 16 | Describe methods of additional analyses (e.g., sensitivity or subgroup analyses, meta-regression), if done, indicating which were pre-specified.                                                         | 6-7                |
| <b>RESULTS</b>              |    |                                                                                                                                                                                                          |                    |
| Study selection             | 17 | Give numbers of studies screened, assessed for eligibility, and included in the review, with reasons for exclusions at each stage, ideally with a flow diagram.                                          | 7, 9 (Fig. 1)      |
| Study characteristics       | 18 | For each study, present characteristics for which data were extracted (e.g., study size, PICOS, follow-up period) and provide the citations.                                                             | 7, 8 (Table 1)     |
| Risk of bias within studies | 19 | Present data on risk of bias of each study and, if available, any outcome level assessment (see item 12).                                                                                                | 9                  |
| Results of individual       | 20 | For all outcomes considered (benefits or harms), present, for each study: (a) simple summary data for each intervention group (b) effect estimates and confidence intervals, ideally with a forest plot. | 9-11               |

|                             |    |                                                                                                                                                                                      |       |
|-----------------------------|----|--------------------------------------------------------------------------------------------------------------------------------------------------------------------------------------|-------|
| studies                     |    |                                                                                                                                                                                      |       |
| Synthesis of results        | 21 | Present results of each meta-analysis done, including confidence intervals and measures of consistency.                                                                              | 9-11  |
| Risk of bias across studies | 22 | Present results of any assessment of risk of bias across studies (see Item 15).                                                                                                      | 12    |
| Additional analysis         | 23 | Give results of additional analyses, if done (e.g., sensitivity or subgroup analyses, meta-regression [see Item 16]).                                                                | 12    |
| <b>DISCUSSION</b>           |    |                                                                                                                                                                                      |       |
| Summary of evidence         | 24 | Summarize the main findings including the strength of evidence for each main outcome; consider their relevance to key groups (e.g., healthcare providers, users, and policy makers). | 13-16 |
| Limitations                 | 25 | Discuss limitations at study and outcome level (e.g., risk of bias), and at review-level (e.g., incomplete retrieval of identified research, reporting bias).                        | 16    |
| Conclusions                 | 26 | Provide a general interpretation of the results in the context of other evidence, and implications for future research.                                                              | 16    |
| <b>FUNDING</b>              |    |                                                                                                                                                                                      |       |
| Funding                     | 27 | Describe sources of funding for the systematic review and other support (e.g., supply of data); role                                                                                 | 17    |



|  |  |                                       |  |
|--|--|---------------------------------------|--|
|  |  | of funders for the systematic review. |  |
|--|--|---------------------------------------|--|

**Appendix 3****Search strategy****Pubmed (407)**

- #1. Diabetes Mellitus, Type 1[Mesh]
- #2. Type 1 Diabetes Mellitus[Title/Abstract]
- #3. T1DM[Title/Abstract]
- #4. Type 1 Diabetes[Title/Abstract]
- #5. OR/#1-4
- #6. closed-loop[Title/Abstract]
- #7. closed loop[Title/Abstract]
- #8. closing loop[Title/Abstract]
- #9. hybrid closed loop[Title/Abstract]
- #10. hybrid closed-loop[Title/Abstract]
- #11. artificial pancreas[Title/Abstract]
- #12. OR/#6-11
- #13. randomized controlled trial[Publication Type]
- #14. controlled clinical trial[Publication Type]
- #15. randomized[Title/Abstract]
- #16. randomly[Title/Abstract]
- #17. controlled[Title/Abstract]
- #18. trial[Title/Abstract]
- #19. random[Title/Abstract]
- #20. placebo[Title/Abstract]
- #21. OR/#13-20
- #22. #5 and #12 and #21

**Cochrane Library (633)**

- #1 MeSH descriptor: [Diabetes Mellitus, Type 1] explode all trees
- #2 MeSH descriptor: [Pancreas, Artificial] explode all trees

#3 ("Diabetes Mellitus, Type 1"):ti,ab,kw OR ("Type 1 Diabetes Mellitus"):ti,ab,kw OR ("T1DM"):ti,ab,kw OR ("Type 1 Diabetes"):ti,ab,kw OR ("diabetes mellitus type-1"):ti,ab,kw (Word variations have been searched)

#4 ("artificial pancreas"):ti,ab,kw OR ("closed-loop"):ti,ab,kw OR ("closed loop control system"):ti,ab,kw OR ("closed-loop control system"):ti,ab,kw OR ("hybrid closed loop"):ti,ab,kw (Word variations have been searched)

#5 #1 or #3

#6 #2 or #4

#7 #5 and #6

#### **Embase (641)**

#1 'insulin dependent diabetes mellitus'/exp

#2 't1dm' OR 'brittle diabetes' OR 'brittle diabetes mellitus' OR 'diabetes mellitus type OR 'diabetes mellitus type i' OR 'diabetes mellitus, brittle' OR 'diabetes mellitus, insulin dependent' OR 'diabetes mellitus, insulin-dependent' OR 'diabetes mellitus, juvenile onset' OR 'diabetes mellitus, type 1' OR 'diabetes mellitus, type i' OR 'diabetes type 1' OR 'diabetes type i' OR 'diabetes, juvenile' OR 'dm 1' OR 'early onset diabetes mellitus' OR 'iddm' OR 'insulin dependent diabetes' OR 'insulin dependent diabetes mellitus' OR 'juvenile diabetes' OR 'juvenile diabetes mellitus' OR 'juvenile onset diabetes' OR 'juvenile onset diabetes mellitus' OR 'ketoacidotic diabetes' OR 'labile diabetes mellitus' OR 'mckusick 22210' OR 'type 1 diabetes' OR 'type 1 diabetes mellitus' OR 'type i diabetes'i OR 'type i diabetes mellitus'

#3 #1 or #2

#4 'artificial pancreas'/exp

#5 'artificial endocrine pancreas' OR 'artificial pancreas' OR 'artificial pancreas islet' OR 'endocrine pancreas, artificial' OR 'pancreas, artificial' OR 'pancreas, artificial endocrine' (3134)

#6 'closed loop' or 'closed-loop'

#7 #4 or #5 or #6

#8 #3 and #7

#9 'clinical trial' or 'randomized controlled trial' or 'controlled clinical trial' or  
'multicenter study' or 'phase 3 clinical trial' or 'phase 4 clinical trial'

#10 #8 and #9

**Appendix 4 PMID or DOIs of studies that have been excluded at full-text review stage**

Follow-up less than 8 weeks (n=55)

|   | Year | DOI                          |
|---|------|------------------------------|
| 1 | 2021 | 10.1089/dia.2020.0589        |
| 2 | 2021 | 10.2337/dc20-2250            |
| 3 | 2021 | 10.2337/dc20-2106            |
| 4 | 2021 | 10.1177/1932296820986879     |
| 5 | 2021 | 10.1089/dia.2021.0037        |
| 6 | 2020 | 10.1111/dom.13898            |
| 7 | 2020 | 10.1089/dia.2020.0365        |
| 8 | 2020 | 10.1089/dia.2020.0546        |
| 9 | 2020 | 10.1089/dia.2020.0022        |
| 0 | 2019 | 10.2337/dc18-1881            |
| 1 | 2019 | 10.1371/journal.pone.0212013 |
| 2 | 2019 | 10.1111/dom.13898            |
| 3 | 2019 | 10.1089/dia.2019.0011        |
| 4 | 2019 | 10.1111/pedi.12867           |
| 5 | 2019 | 10.1111/dom.13585            |
| 6 | 2018 | 10.2337/dc18-0228            |
| 7 | 2018 | 10.1089/dia.2017.0346        |

|        |      |                               |
|--------|------|-------------------------------|
| 1<br>8 | 2017 | 10.1111/dom.12852             |
| 1<br>9 | 2017 | 10.1111/dom.12880             |
| 2<br>0 | 2017 | 10.1016/S0140-6736(16)32567-3 |
| 2<br>1 | 2017 | 10.1007/s00125-017-4395-z     |
| 2<br>2 | 2017 | 10.1089/dia.2016.0424         |
| 2<br>3 | 2017 | 10.1210/jc.2017-00556         |
| 2<br>4 | 2017 | 10.2337/dc17-0883             |
| 2<br>5 | 2017 | 10.1016/S2213-8587(17)30001-3 |
| 2<br>6 | 2016 | 10.2337/dc15-2078             |
| 2<br>7 | 2016 | 10.1089/dia.2016.0288         |
| 2<br>8 | 2016 | 10.1016/S2213-8587(15)00489-1 |
| 2<br>9 | 2016 | 10.1111/dom.12707             |
| 3<br>0 | 2016 | 10.1016/j.diabet.2015.05.001  |
| 3<br>1 | 2016 | 10.1111/dom.12663             |
| 3<br>1 | 2016 | 10.2337/dc15-2815             |

|   |      |                                                                                           |
|---|------|-------------------------------------------------------------------------------------------|
| 2 |      |                                                                                           |
| 3 | 2016 | 10.2337/dc15-2468                                                                         |
| 3 |      |                                                                                           |
| 3 | 2015 | 10.2337/dc13-0010                                                                         |
| 4 |      |                                                                                           |
| 3 | 2015 | 10.1056/NEJMoa1314474                                                                     |
| 5 |      |                                                                                           |
| 3 | 2015 | 10.1177/1932296815616134                                                                  |
| 6 |      |                                                                                           |
| 3 | 2015 | 10.2337/dc14-3073                                                                         |
| 7 |      |                                                                                           |
| 3 | 2015 | 10.1016/S2213-8587(14)70226-8                                                             |
| 8 |      |                                                                                           |
| 3 | 2015 | <a href="https://doi.org/10.1016/S2213-8587(15)00141-2">10.1016/S2213-8587(15)00141-2</a> |
| 9 |      |                                                                                           |
| 4 | 2015 | 10.1089/dia.2014.0259                                                                     |
| 0 |      |                                                                                           |
| 4 | 2014 | 10.1111/pedi.12071                                                                        |
| 1 |      |                                                                                           |
| 4 | 2014 | 10.2337/dc14-0835                                                                         |
| 2 |      |                                                                                           |
| 4 | 2014 | 10.2337/dc14-0147                                                                         |
| 3 |      |                                                                                           |
| 4 | 2014 | 10.2337/dc13-2911                                                                         |
| 4 |      |                                                                                           |
| 4 | 2014 | 10.2337/dc13-2076                                                                         |
| 5 |      |                                                                                           |
| 4 | 2014 | 10.2337/dc13-2644                                                                         |
| 6 |      |                                                                                           |

|        |      |                               |
|--------|------|-------------------------------|
| 4<br>7 | 2014 | 10.1111/dom.12324             |
| 4<br>8 | 2014 | 10.2337/dc13-1631             |
| 4<br>9 | 2014 | 10.2337/dc12-1079             |
| 5<br>0 | 2013 | 10.2337/dc12-1965             |
| 5<br>1 | 2013 | 10.1503/cmaj.121265           |
| 5<br>2 | 2013 | 10.2337/dc12-1079             |
| 5<br>3 | 2013 | 10.1089/dia.2013.0002         |
| 5<br>4 | 2012 | 10.1089/dia.2012.0004         |
| 5<br>5 | 2010 | 10.1016/S0140-6736(09)61998-X |

## Specific disease states(n=4)

|   | Year | DOI                |
|---|------|--------------------|
| 1 | 2021 | 10.1111/dom.14214  |
| 2 | 2020 | 10.2337/dc19-1433  |
| 3 | 2017 | 10.1111/pedi.12410 |
| 4 | 1979 | PMID: 220725       |

## No control group or control group did not meet the inclusion criteria(n=15)

|   | Year | DOI                   |
|---|------|-----------------------|
| 1 | 2021 | 10.1089/dia.2021.0097 |



|   |      |                               |
|---|------|-------------------------------|
| 2 | 2021 | 10.1111/dom.14355             |
| 3 | 2021 | 10.1016/S0140-6736(20)32514-9 |
| 4 | 2021 | 10.1089/dia.2020.0500         |
| 5 | 2020 | 10.1049/jet-syb.2020.0053     |
| 6 | 2020 | 10.1111/pedi.12962            |
| 7 | 2018 | 10.1089/dia.2018.0202         |
| 8 | 2017 | 10.1089/dia.2016.0461         |
| 9 | 2017 | 10.1089/dia.2016.0421         |
| 0 | 2016 | 10.1007/s00125-016-4107-0     |
| 1 | 2016 | 10.2337/dc15-2344             |
| 2 | 2016 | 10.1210/jc.2015-3003          |
| 3 | 2013 | 10.1089/dia.2013.0036         |
| 4 | 2013 | 10.2337/dc12-1956             |
| 5 | 1986 | 10.2337/diacare.9.2.124       |

The aim of the study was not to assess the effectiveness and safety of closed-loop insulin pumps(n=33)

|   | Year | DOI                        |
|---|------|----------------------------|
| 1 | 2021 | 10.1089/dia.2020.0472      |
| 2 | 2021 | 10.2337/dc20-1729          |
| 3 | 2021 | 10.1089/dia.2020.0593      |
| 4 | 2020 | 10.1007/s00125-020-05244-y |

|   |      |                            |
|---|------|----------------------------|
| 5 | 2020 | 10.1016/j.jcjd.2019.08.003 |
| 6 | 2020 | 10.2337/dc19-2041          |
| 7 | 2020 | 10.1007/s11428-020-00614-x |
| 8 | 2020 | 10.2337/dc19-0895          |
| 9 | 2019 | 10.1111/dme.13887          |
| 0 | 2019 | 10.1089/dia.2018.0328      |
| 1 | 2019 | 10.2196/14087              |
| 2 | 2018 | 10.1111/dom.13304          |
| 3 | 2018 | 10.1038/s41598-018-20785-4 |
| 4 | 2017 | 10.1109/TBME.2016.2590498  |
| 5 | 2017 | 10.1177/1932296816678631   |
| 6 | 2017 | 10.1089/dia.2016.0443      |
| 7 | 2017 | 10.1111/dme.13268          |
| 8 | 2017 | 10.2337/dc17-0500          |
| 9 | 2017 | 10.1089/dia.2016.0307      |
| 0 | 2017 | 10.1177/1932296817702656   |
| 1 | 2016 | 10.1111/dme.12823          |

|        |      |                            |
|--------|------|----------------------------|
| 2<br>2 | 2016 | 10.2337/dc16-1073          |
| 3<br>2 | 2016 | 10.1089/dia.2016.0311      |
| 4<br>2 | 2016 | 10.1089/dia.2016.0043      |
| 5<br>2 | 2016 | 10.1111/pedi.12230         |
| 6<br>2 | 2015 | 10.1111/dom.12549          |
| 7<br>2 | 2015 | 10.1210/jc.2015-2081       |
| 8<br>2 | 2015 | 10.1111/dme.12706          |
| 9<br>2 | 2014 | 10.1177/1932296814532238   |
| 0<br>3 | 2014 | 10.1089/dia.2014.0050      |
| 1<br>3 | 2014 | 10.1136/bmjdr-2014-000025  |
| 2<br>3 | 2010 | 10.1177/193229681000400602 |
| 3<br>3 | 2010 | 10.1089/dia.2009.0084      |

**Appendix 5****Data extraction form**

| Data extraction form           |  |                     |  |
|--------------------------------|--|---------------------|--|
| Article title                  |  |                     |  |
| First author                   |  | Year of publication |  |
| NCT                            |  | Document type       |  |
| Date of information extraction |  | Extractor           |  |
| Methodological characteristics |  |                     |  |

|                                                                        |                                                                            |                                                                                                        |
|------------------------------------------------------------------------|----------------------------------------------------------------------------|--------------------------------------------------------------------------------------------------------|
| Randomized sequence generation and allocation hiding                   | Randomized controlled trial : yes or no<br>Crossover test : yes or no      | Random allocation sequence generation method :<br>Whether to hide the random sequence and its method : |
| Who is subject to blindness laws                                       | Patients/intervener/evaluators of the outcome/<br>Analysts of statistics : | Basis for judgment :                                                                                   |
| Loss/dropout/withdrawal (n: number of lost visits; N: number of cases) |                                                                            |                                                                                                        |
| Selective reporting outcomes                                           | Yes or no<br>basis for judgment :                                          |                                                                                                        |
| analysis of intentionality                                             | Yes or no<br>basis for judgment :                                          |                                                                                                        |
| Baseline information                                                   | Comparability :<br>basis for judgment :                                    |                                                                                                        |
| Other bias                                                             |                                                                            |                                                                                                        |
| Participant characteristics                                            |                                                                            |                                                                                                        |
| Source of Subjects                                                     |                                                                            |                                                                                                        |
| Number of patients                                                     |                                                                            |                                                                                                        |
| Sex (men/women)                                                        |                                                                            |                                                                                                        |
| age                                                                    |                                                                            |                                                                                                        |
| Age category                                                           |                                                                            |                                                                                                        |
| BMI(kg/m <sup>2</sup> )                                                |                                                                            |                                                                                                        |
| Duration of diabetes                                                   |                                                                            |                                                                                                        |
| Duration of insulin treatment                                          |                                                                            |                                                                                                        |
| HbA1c %                                                                |                                                                            |                                                                                                        |

|                                           |                                                                                                |               |
|-------------------------------------------|------------------------------------------------------------------------------------------------|---------------|
| Interventions                             |                                                                                                |               |
|                                           | experimental group                                                                             | control group |
| location                                  |                                                                                                |               |
| Follow-up time                            |                                                                                                |               |
| Research Methods                          |                                                                                                |               |
| specific measure                          | the name of the insulin pump<br>algorithm :<br>Single hormone/dual hormone :<br>overnight/24h: |               |
| Outcome indicators                        |                                                                                                |               |
| Main outcome indicators :                 |                                                                                                |               |
| Secondary outcome indicators :            |                                                                                                |               |
| Result data table                         |                                                                                                |               |
| Indicator name                            | experimental group                                                                             | control group |
| during 24-hour period                     |                                                                                                |               |
| the proportion (%) of time in             |                                                                                                |               |
| In target range (TIR)<br>(3.9-10.0mmol/L) |                                                                                                |               |
| above target range<br>(TAR) (>10 mmol/L)  |                                                                                                |               |
| below target range<br>(TBR) (<3.9 mmol/L) |                                                                                                |               |
| glycated<br>hemoglobin(HbA1c %)           |                                                                                                |               |
| >13.3 mmol/l                              |                                                                                                |               |
| low blood glucose index<br>(LBGI)         |                                                                                                |               |

|                                          |  |  |
|------------------------------------------|--|--|
| high blood glucose index (HBGI)          |  |  |
| coefficient of variation of glucose (CV) |  |  |
| mean glucose (MG)                        |  |  |
| total daily insulin dose                 |  |  |
| During the day                           |  |  |
| the proportion (%) of time in            |  |  |
| In target range (TIR) (3.9-10.0mmol/L)   |  |  |
| above target range (TAR) (>10 mmol/L)    |  |  |
| below target range (TBR) (<3.9 mmol/L)   |  |  |
| glycated hemoglobin(HbA1c %)             |  |  |
| >13.3 mmol/l                             |  |  |
| low blood glucose index (LBGI)           |  |  |
| high blood glucose index (HBGI)          |  |  |
| coefficient of variation of glucose (CV) |  |  |
| mean glucose (MG)                        |  |  |
| total daily insulin dose                 |  |  |
| During the nighttime                     |  |  |
| the proportion (%) of time in            |  |  |
| In target range (TIR)                    |  |  |

|                                             |  |  |
|---------------------------------------------|--|--|
| (3.9-10.0mmol/L)                            |  |  |
| above target range<br>(TAR) (>10 mmol/L)    |  |  |
| below target range<br>(TBR) (<3.9 mmol/L)   |  |  |
| glycated<br>hemoglobin(HbA1c %)             |  |  |
| >13.3 mmol/l                                |  |  |
| low blood glucose index<br>(LBGI)           |  |  |
| high blood glucose index<br>(HBGI)          |  |  |
| coefficient of variation<br>of glucose (CV) |  |  |
| mean glucose (MG)                           |  |  |
| total daily insulin dose                    |  |  |
| Adverse events                              |  |  |
| Hypoglycemic event                          |  |  |
| Hyperglycemia event                         |  |  |
| Other adverse events                        |  |  |

## Appendix 6

### Overall risk of bias assessment

Key domains for assessment of risk of bias for the primary outcome:

Sequence generation (or randomised treatment order for cross-over studies)

Allocation concealment

Blinding

Selective reporting

Incomplete outcome data



### Other bias

The overall risk of bias was assessed in compliance with the following rules:

If a study was considered at high risk of bias for any of the aforementioned domains, the study was

characterised as “high risk study”

If a study was considered at low risk of bias for all aforementioned domains, the study was characterised as “low risk study”

In any other case the study was considered as “unclear risk study”

**Appendix 7.** Risk of bias graph: review authors' judgements about each risk of bias item presented as percentages across all included studies

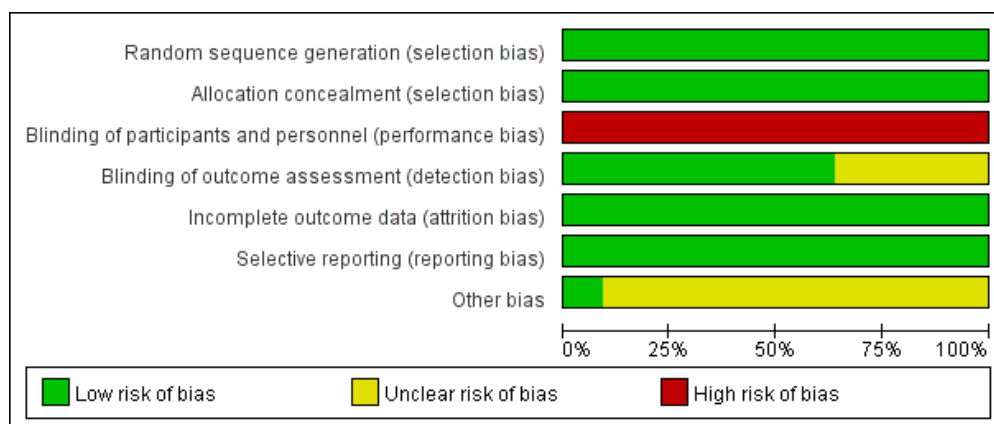

**Appendix 8.** Risk of bias summary: review authors' judgements about each risk of bias item for each included study.

|                                           | Random sequence generation (selection bias) | Allocation concealment (selection bias) | Blinding of participants and personnel (performance bias) | Blinding of outcome assessment (detection bias) | Incomplete outcome data (attrition bias) | Selective reporting (reporting bias) | Other bias |
|-------------------------------------------|---------------------------------------------|-----------------------------------------|-----------------------------------------------------------|-------------------------------------------------|------------------------------------------|--------------------------------------|------------|
| Boris Kovatchev 2020                      | +                                           | +                                       | -                                                         | +                                               | +                                        | +                                    | ?          |
| Boris P Kovatchev 2020                    | +                                           | +                                       | -                                                         | ?                                               | +                                        | +                                    | ?          |
| H. Thabit 2015 (Adults)                   | +                                           | +                                       | -                                                         | ?                                               | +                                        | +                                    | ?          |
| H. Thabit 2015 (Children and Adolescents) | +                                           | +                                       | -                                                         | ?                                               | +                                        | +                                    | ?          |
| Jort Kropff 2015                          | +                                           | +                                       | -                                                         | ?                                               | +                                        | +                                    | ?          |
| Marc D. Breton 2020                       | +                                           | +                                       | -                                                         | +                                               | +                                        | +                                    | ?          |
| Martin Tauschmann 2018                    | +                                           | +                                       | -                                                         | +                                               | +                                        | +                                    | +          |
| McAuley, S. A 2020                        | +                                           | +                                       | -                                                         | +                                               | +                                        | +                                    | ?          |
| Pierre-Yves Benhamou 2019                 | +                                           | +                                       | -                                                         | +                                               | +                                        | +                                    | ?          |
| S.A. Brown 2019                           | +                                           | +                                       | -                                                         | +                                               | +                                        | +                                    | ?          |
| S.A. Brown 2020                           | +                                           | +                                       | -                                                         | +                                               | +                                        | +                                    | ?          |

**Appendix 9.** Contour-enhanced funnel plot for studies assessing time spent in near normoglycaemia

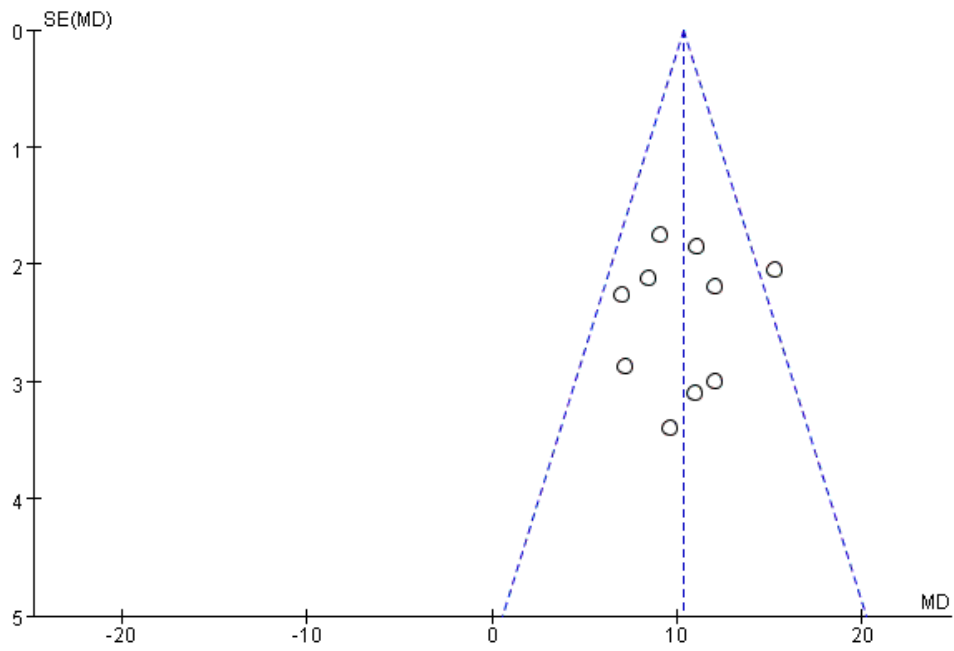

**Appendix 10.** Forest plot of Daily insulin dose

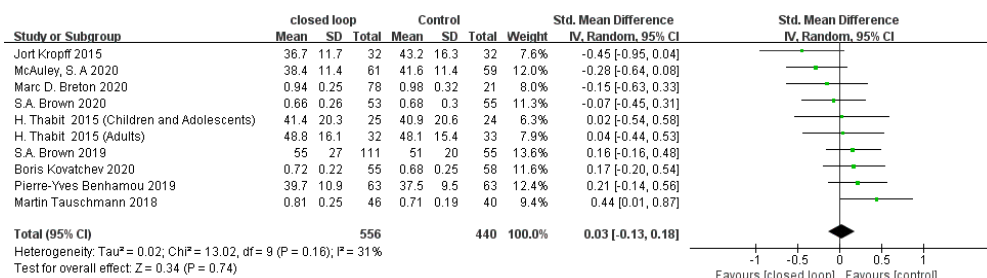

**Appendix 11.** Forest plot of satisfaction and Quality of Life.

satisfaction with diabetes treatment

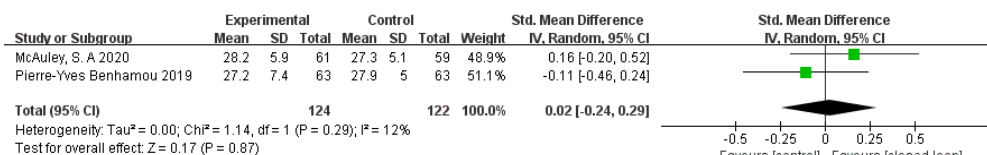

quality of life with diabetes

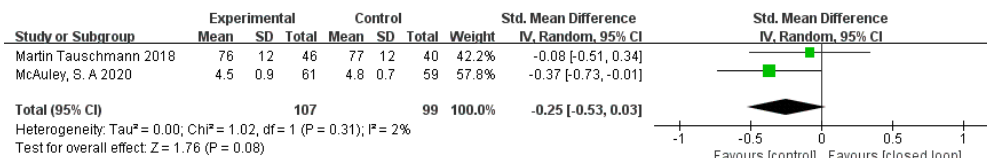

**Appendix 12.** Forest plot of Body weight

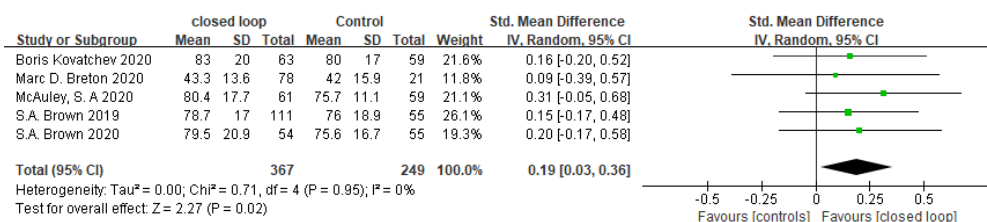

**Appendix 13.** The meta-regression by designed subgroups for time in target range (TIR) (70-180 mg/dl) at night

| _meta_es               | Coef.     | Std. Err. | z     | P> z  | [95% Conf. Interval] |          |
|------------------------|-----------|-----------|-------|-------|----------------------|----------|
| agecategory            | .8437925  | .532501   | 1.58  | 0.113 | -.1998902            | 1.887475 |
| periodofuse            | -.8946046 | 1.105487  | -0.81 | 0.418 | -3.06132             | 1.272111 |
| studyduration          | -.0897639 | .0833949  | -1.08 | 0.282 | -.2532148            | .0736871 |
| algorithmtype          | -.5916082 | .5189248  | -1.14 | 0.254 | -1.608682            | .4254658 |
| studytype              | 1.281638  | 1.333926  | 0.96  | 0.337 | -1.332809            | 3.896084 |
| differentcontrolgroups | -1.998541 | 1.0922    | -1.83 | 0.067 | -4.139213            | .1421311 |
| _cons                  | 3.558332  | 2.447912  | 1.45  | 0.146 | -1.239488            | 8.356152 |

Test of residual homogeneity:  $Q_{res} = \text{chi2}(2) = 14.38$  Prob >  $Q_{res} = 0.0008$

#### Appendix 14. Forest plots for subgroup analysis of nighttime TIR (70-180 mg/dl) indicators according to different control groups

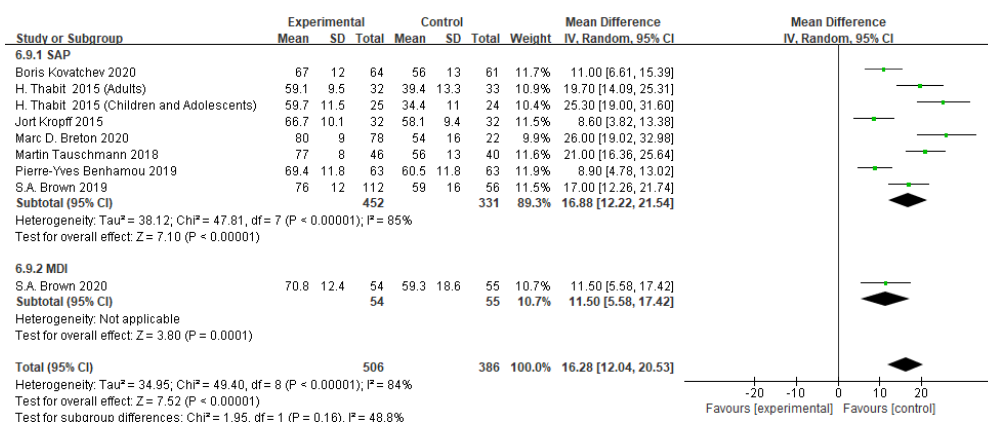

#### Appendix 15 Forest plot for the subgroup analyzed by designed subgroups for time in target

range (TIR) (70-180 mg/dl)

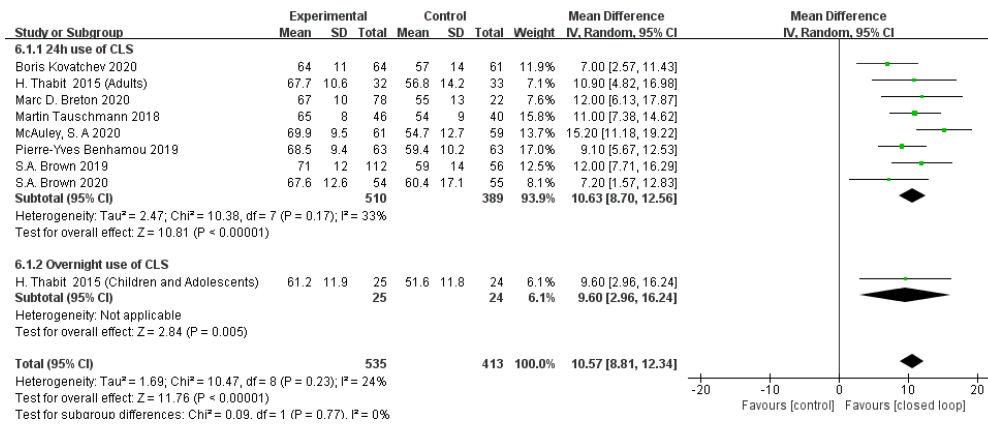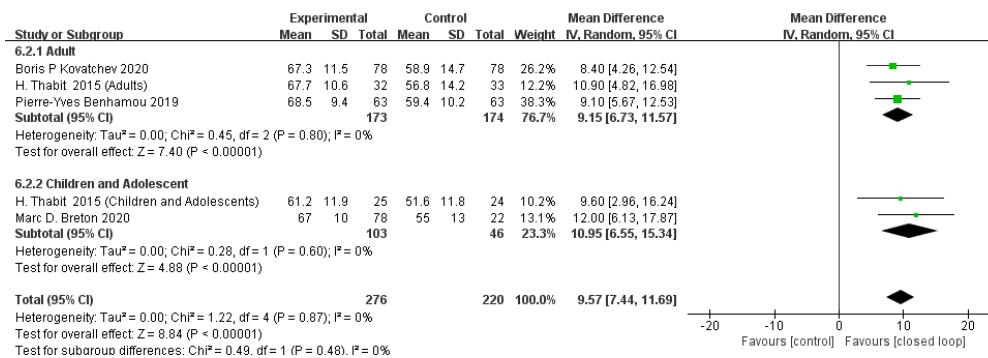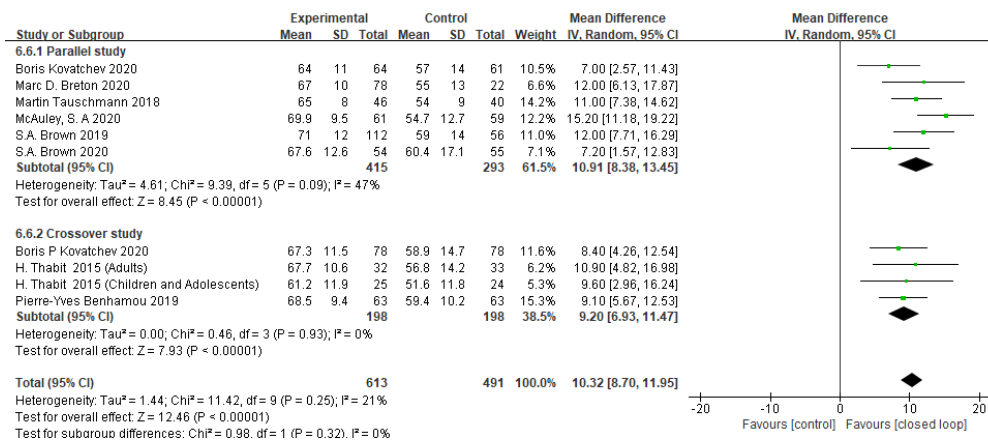

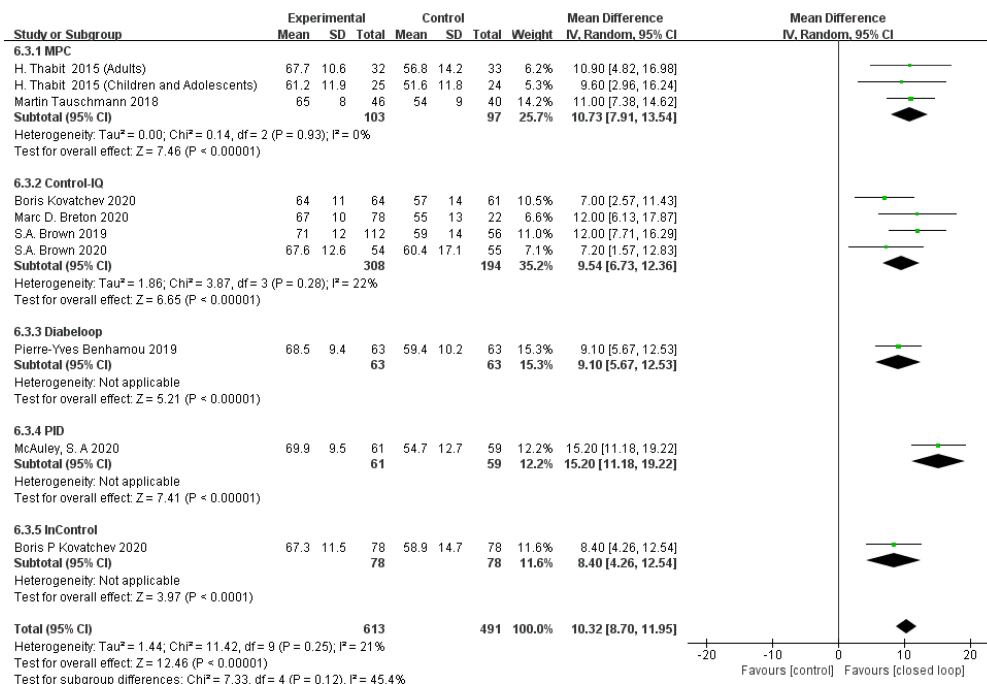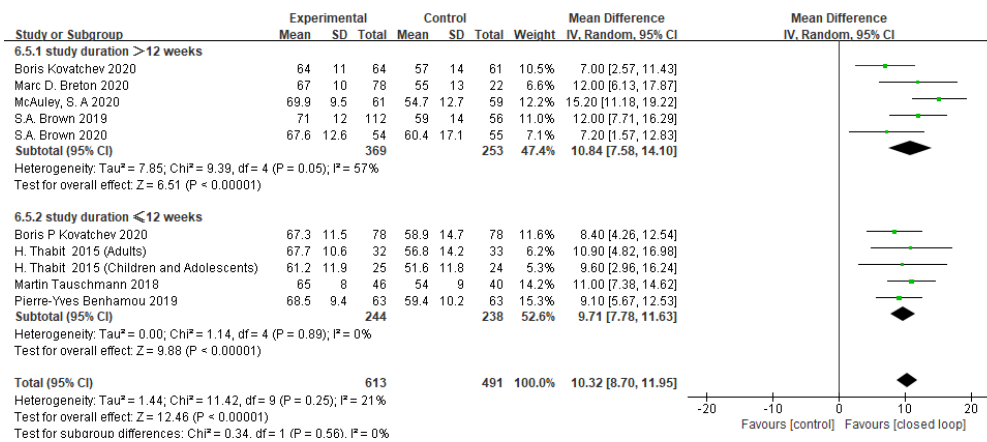



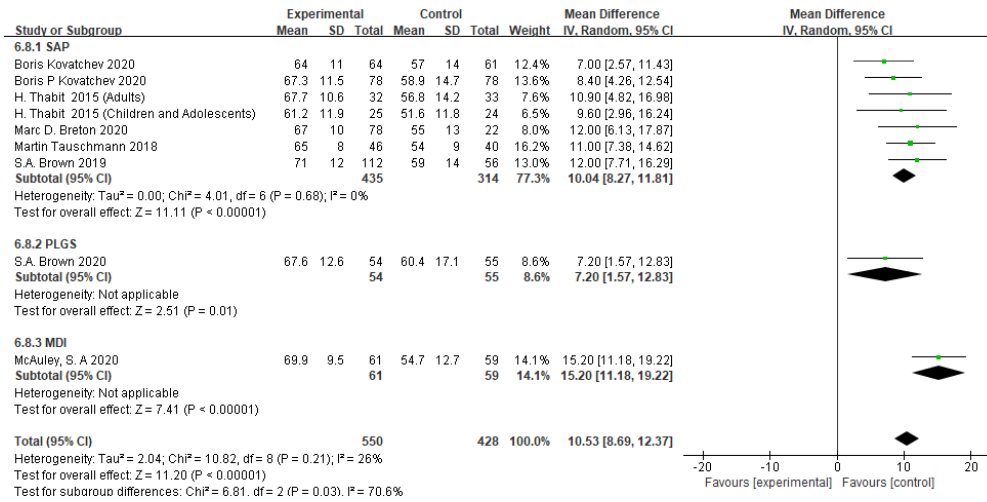

## Appendix 16. Forest plot of serious adverse events

### Severe hypoglycaemic events

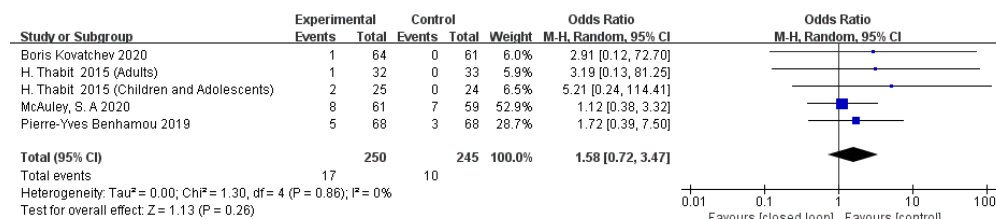

### hyperglycaemic events

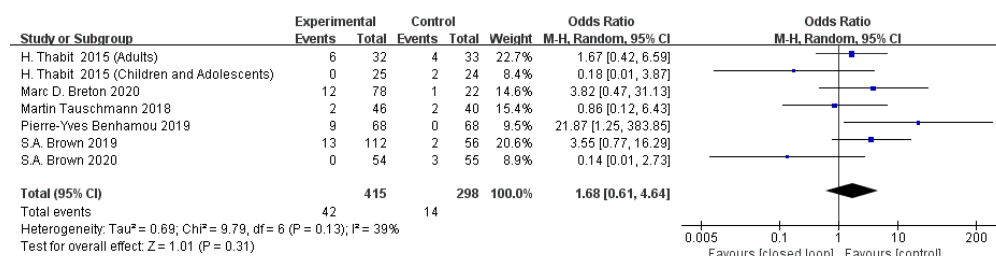

### diabetic ketoacidosis events

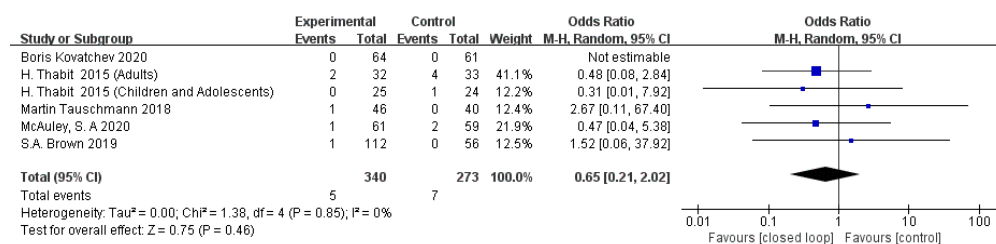

Supplement: bmjdrc-2021-002633supp002.pdf [file bmjdrc-2021-002633supp002.pdf]
